# Supplementary material
Source: PubMed Central journal article supplement (PMC9973407)
Supplement: crc-21-0027-s01.pdf [file crc-21-0027-s01.pdf]

**Supplemental Information for:**

**8-azaadenosine and 8-chloroadenosine are not selective inhibitors of ADAR**

Kyle A. Cottrell<sup>1</sup>, Luisangely Soto Torres<sup>1</sup>, Michael G. Dizon<sup>1</sup>, Jason D. Weber<sup>1,2,\*</sup>

<sup>1</sup>Department of Medicine, Division of Molecular Oncology and <sup>2</sup>Department of Cell Biology and Physiology, Siteman Cancer Center, Washington University School of Medicine, Saint Louis, Missouri, USA

\*Corresponding author

Correspondence:

Jason D. Weber, Ph.D.

Department of Medicine

Division of Molecular Oncology

Washington University School of Medicine

660 South Euclid Avenue

Campus Box 8069

St. Louis, MO 63110 USA

Email: [jweber@wustl.edu](mailto:jweber@wustl.edu)

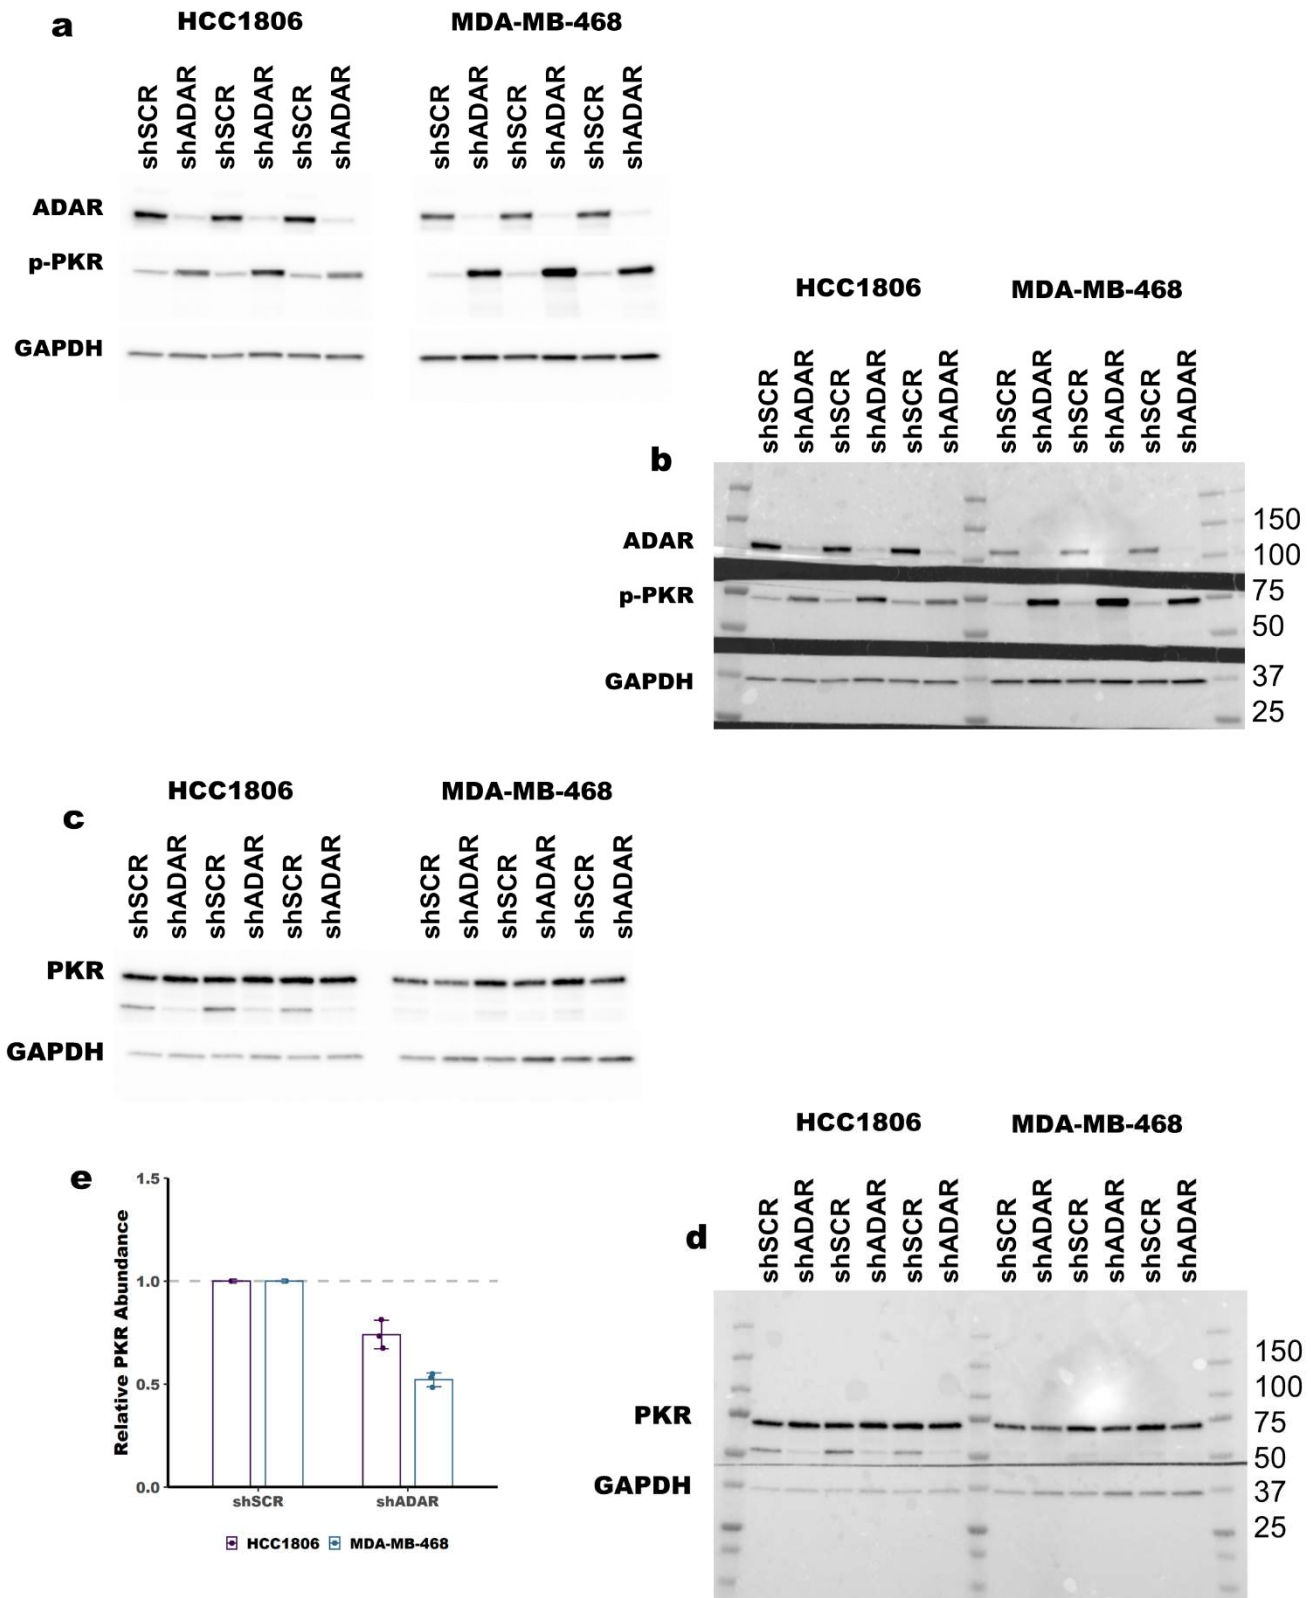

**Supplemental Figure 1:**

Uncropped immunoblots associated with Figure 3A, 3C and 3D. Panels **a** and **b** are the uncropped chemiluminescence images, panels **b** and **d** are the chemiluminescence images merged with colorimetric images to show the molecular weight marker. **e** Quantification of PKR expression, PKR abundance was normalized to GAPDH and set relative shSCR.

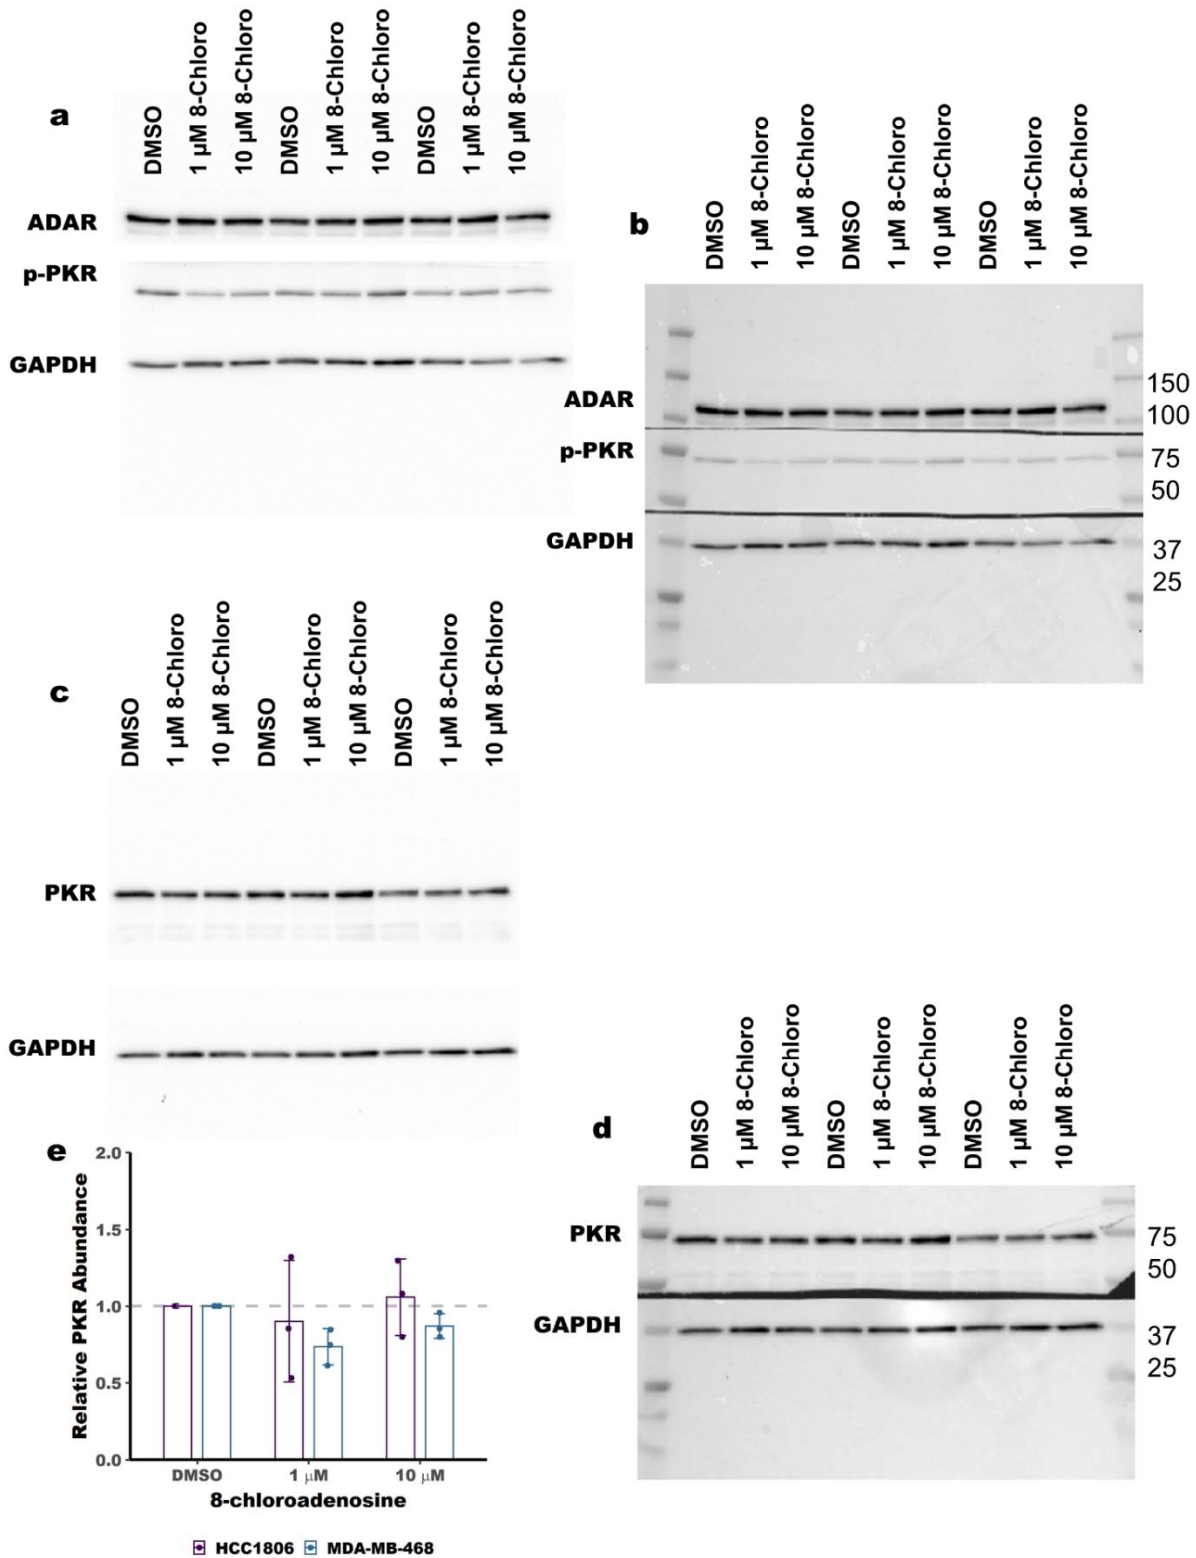

### Supplemental Figure 2:

Uncropped immunoblots for MDA-MB-468 treatment with 8-chloroadenosine (8-chloro) associated with Figure 3b, 3e and 3f. Panels **a** and **b** are the uncropped chemiluminescence images, panels **b** and **d** are the chemiluminescence images merged with colorimetric images to show the molecular weight marker. **e** Quantification of PKR expression, PKR abundance was normalized to GAPDH and set relative DMSO.

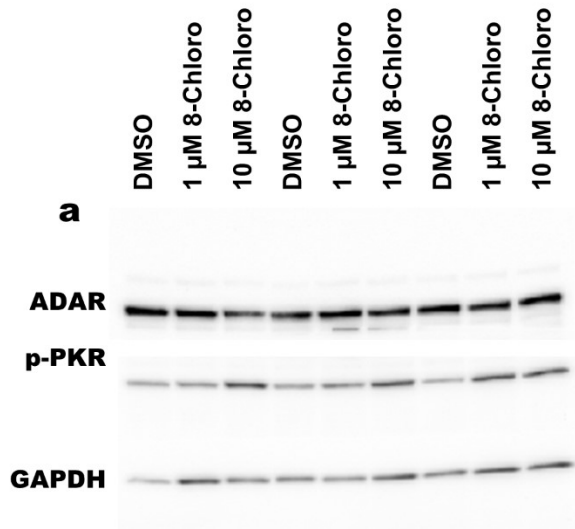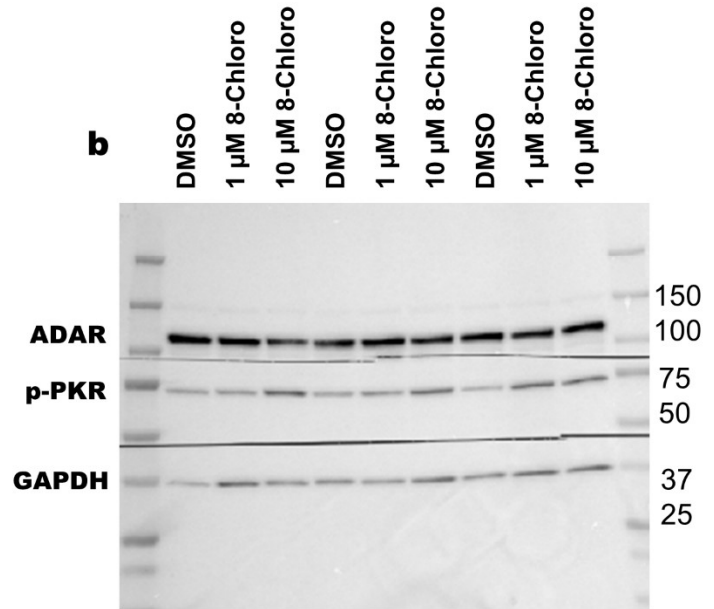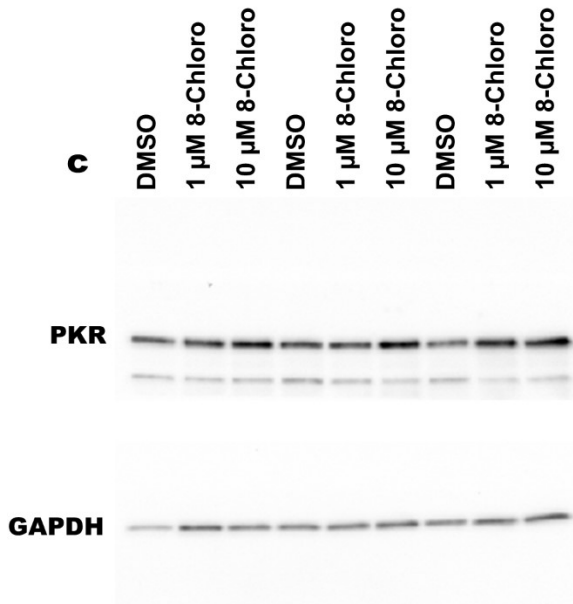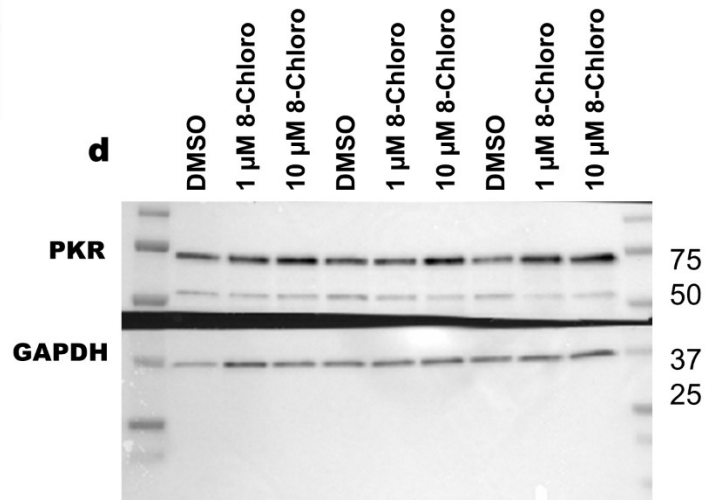

### Supplemental Figure 3:

Uncropped immunoblots for HCC1806 treatment with 8-chloroadenosine (8-chloro) associated with Figure 3b, 3e and 3f. Panels **a** and **b** are the uncropped chemiluminescence images, panels **b** and **d** are the chemiluminescence images merged with colorimetric images to show the molecular weight marker.

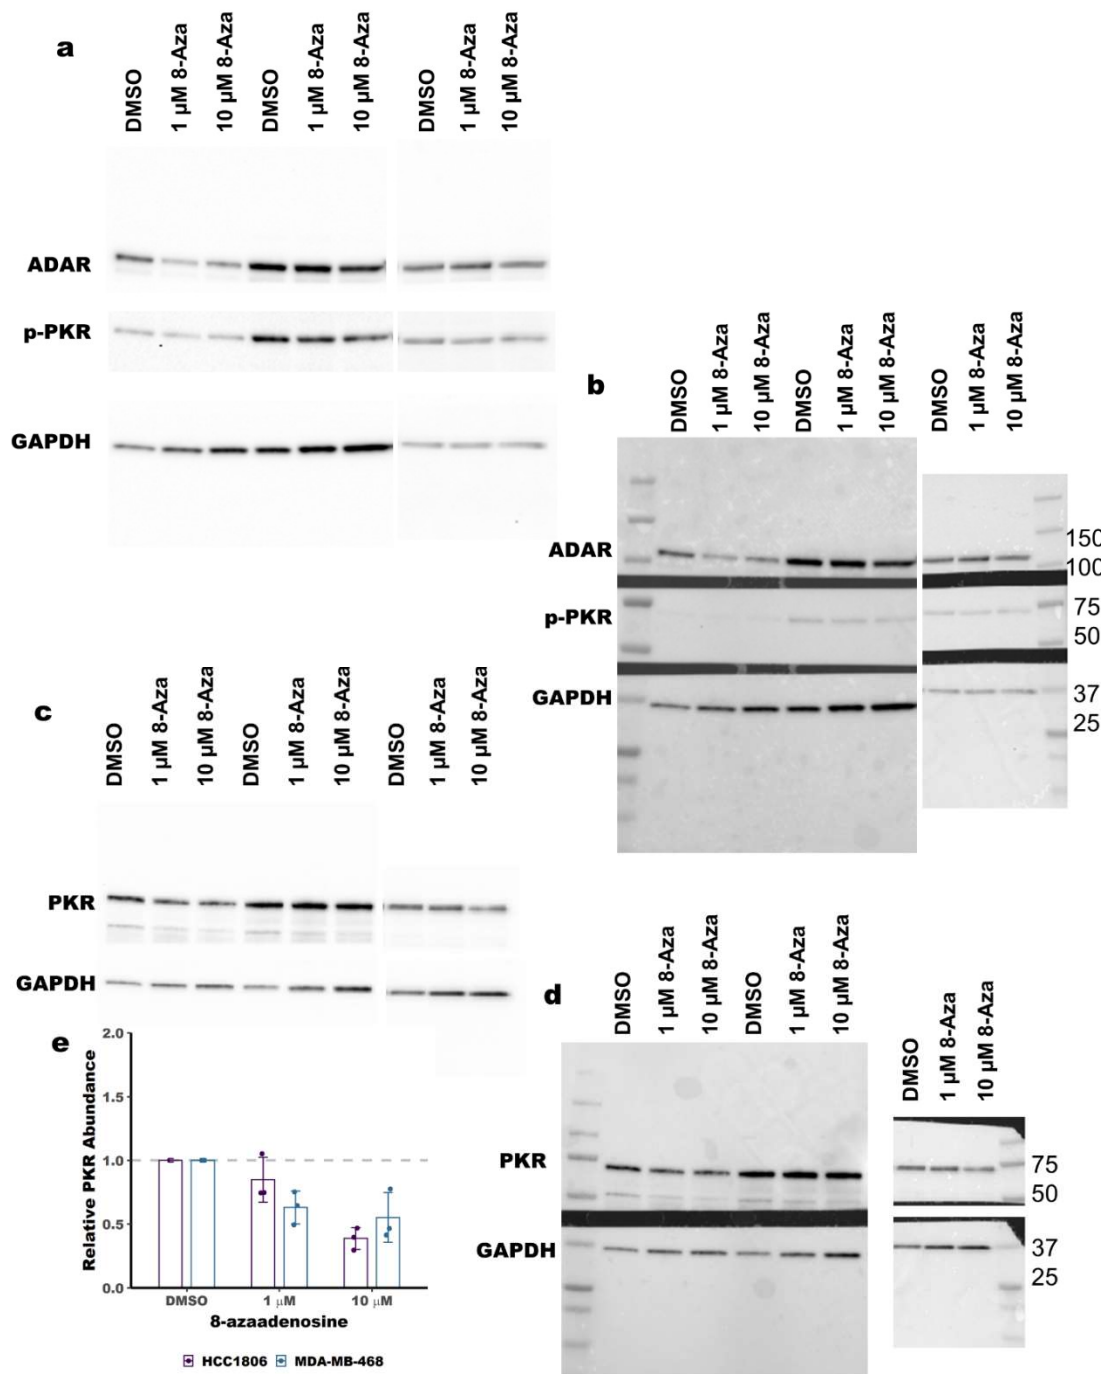

#### Supplemental Figure 4:

Uncropped immunoblots for MDA-MB-468 treatment with 8-azaadenosine (8-Aza) associated with Figure 3g-3i. Panels **a** and **b** are the uncropped chemiluminescence images, panels **b** and **d** are the chemiluminescence images merged with colorimetric images to show the molecular weight marker. **e** Quantification of PKR expression, PKR abundance was normalized to GAPDH and set relative DMSO.

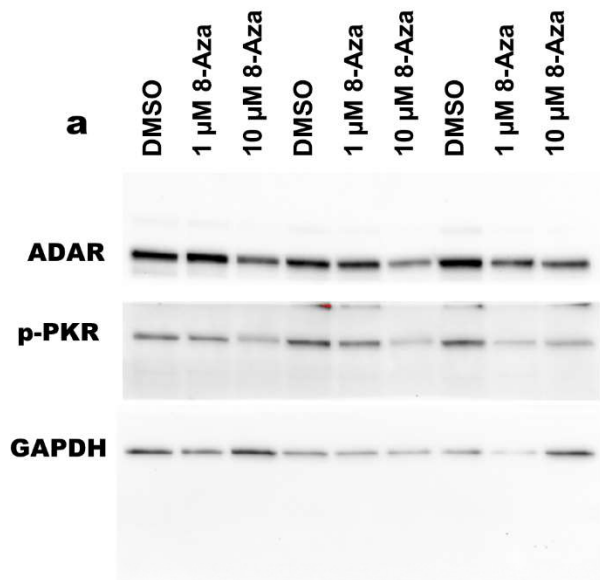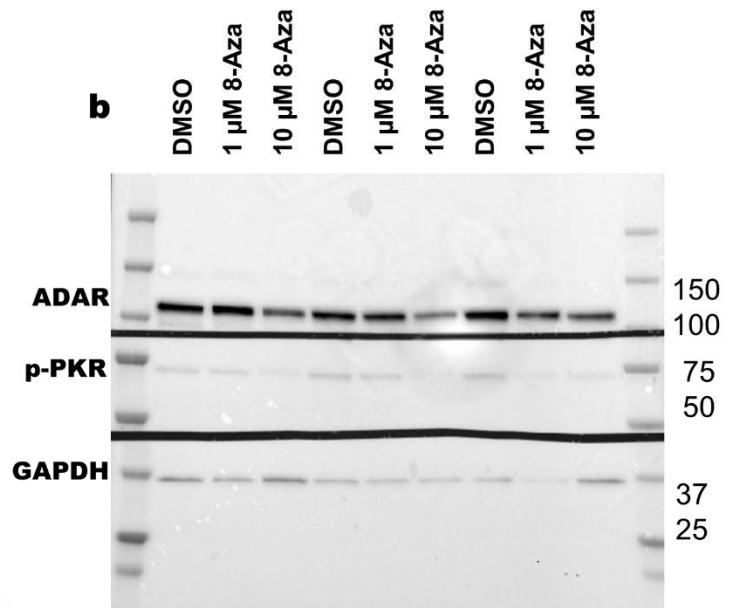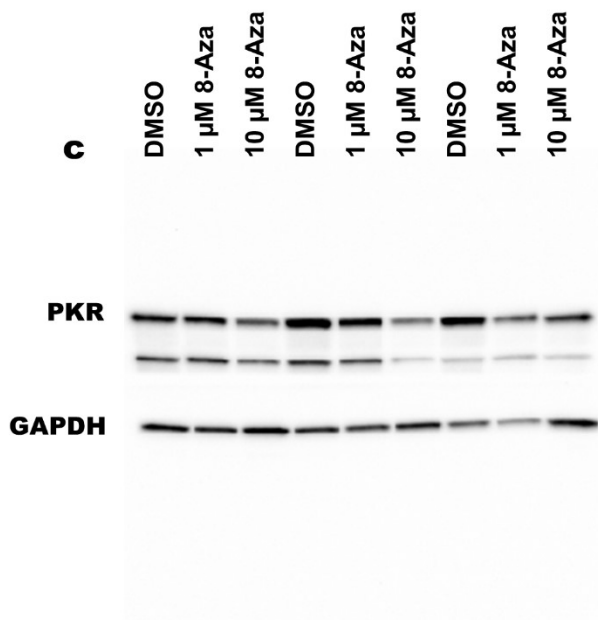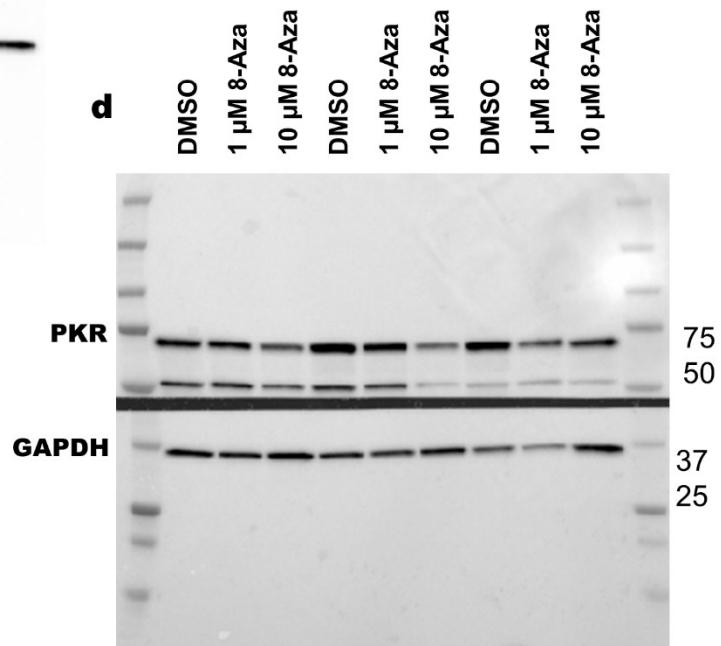

### Supplemental Figure 5:

Uncropped immunoblots for HCC1806 treatment with 8-azaadenosine (8-Aza) associated with Figure 3g-3i. Panels **a** and **b** are the uncropped chemiluminescence images, panels **b** and **d** are the chemiluminescence images merged with colorimetric images to show the molecular weight marker.

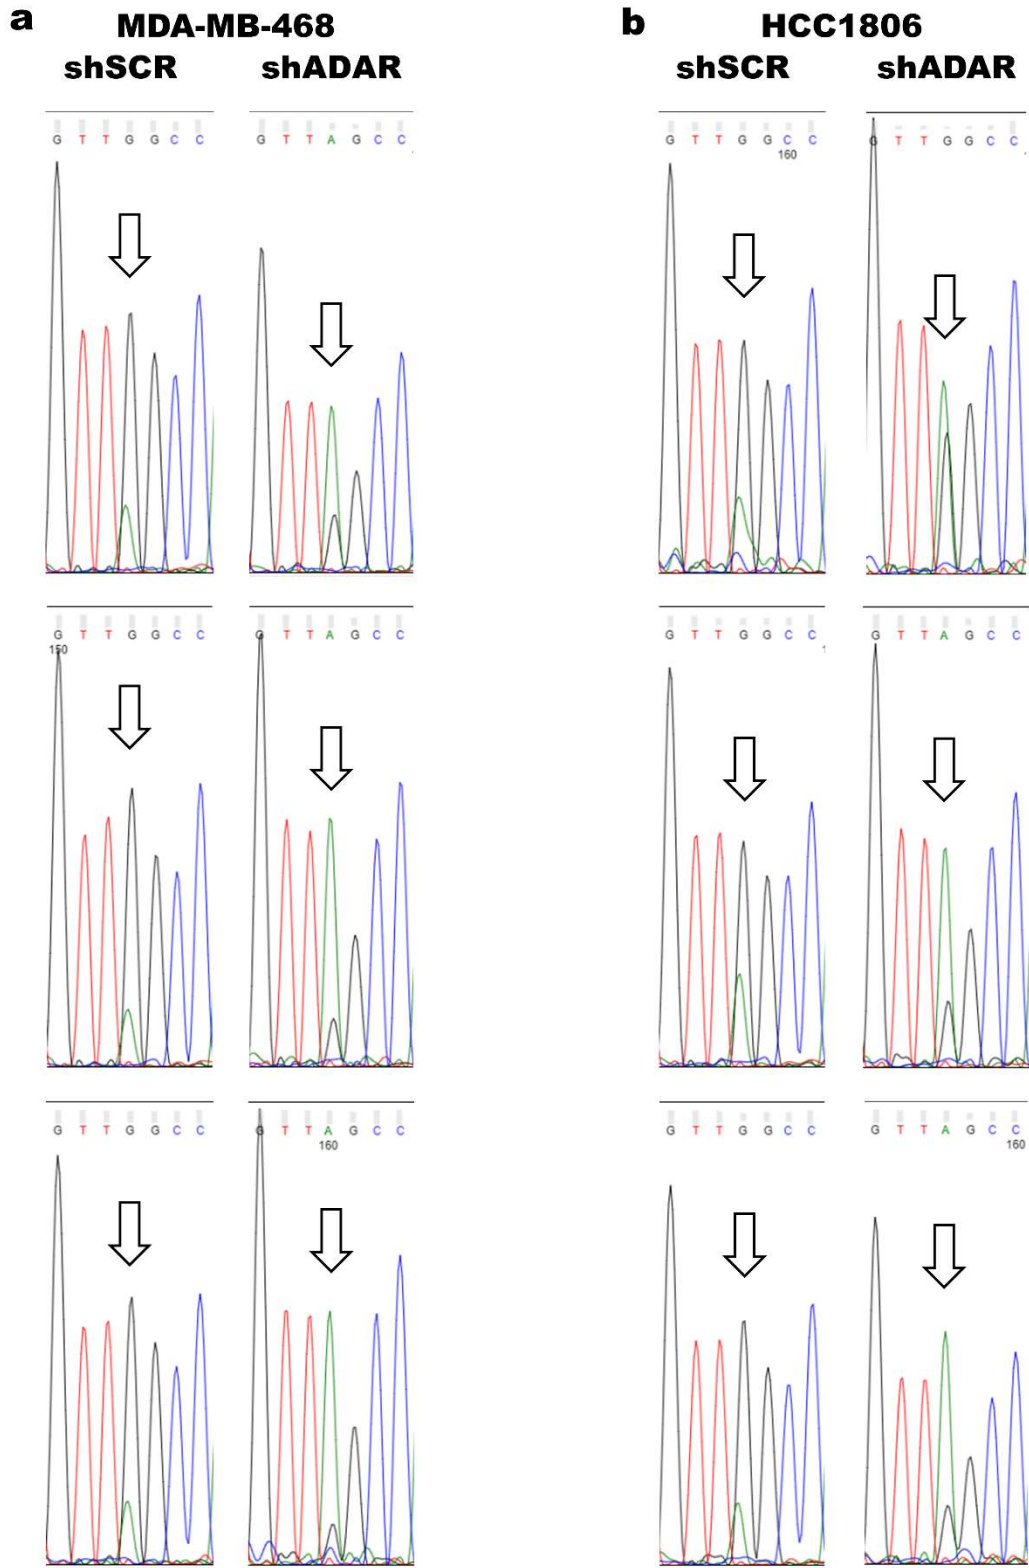

**Supplemental Figure 6:**

Chromatograms for all Sanger sequencing replicates associated with Figure 4a-b.

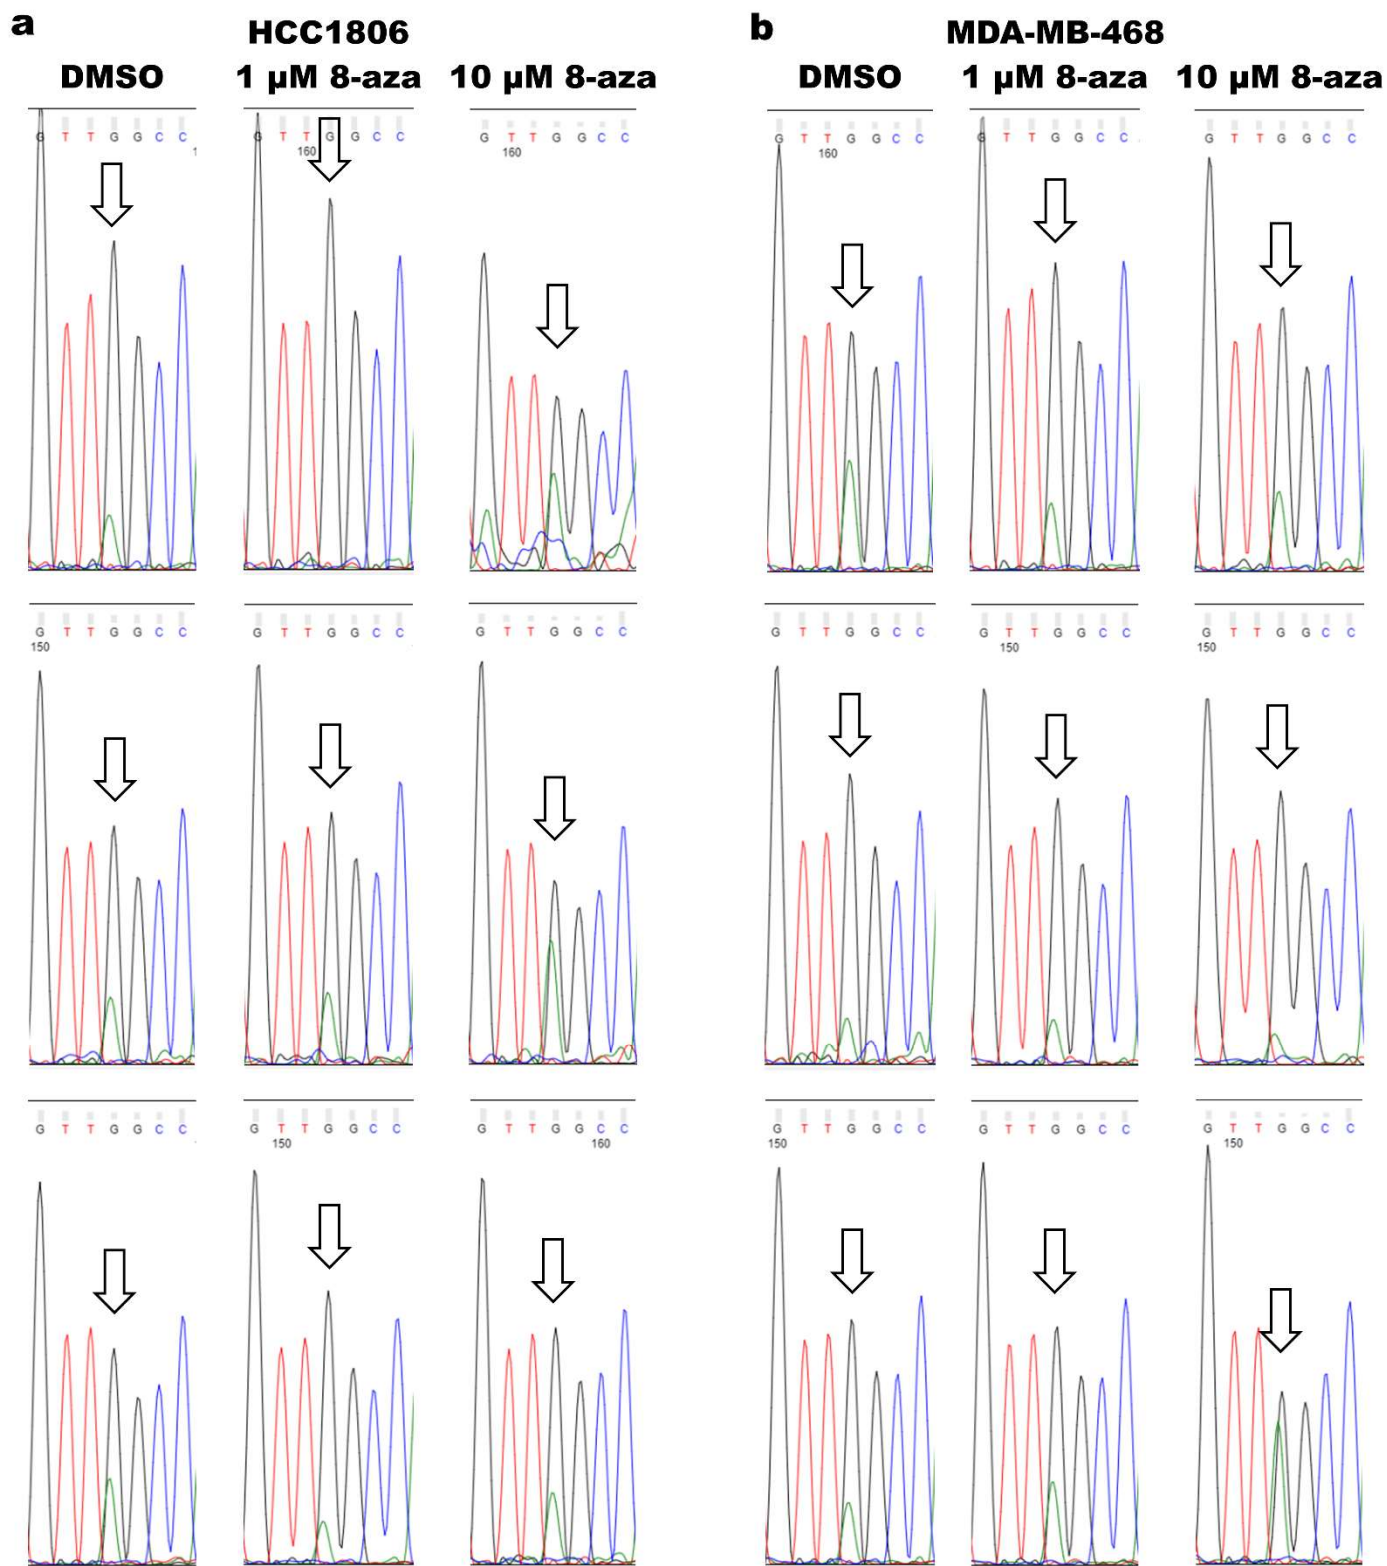

**Supplemental Figure 7:**

Chromatograms for all Sanger sequencing replicates associated with Figure 4c-d.



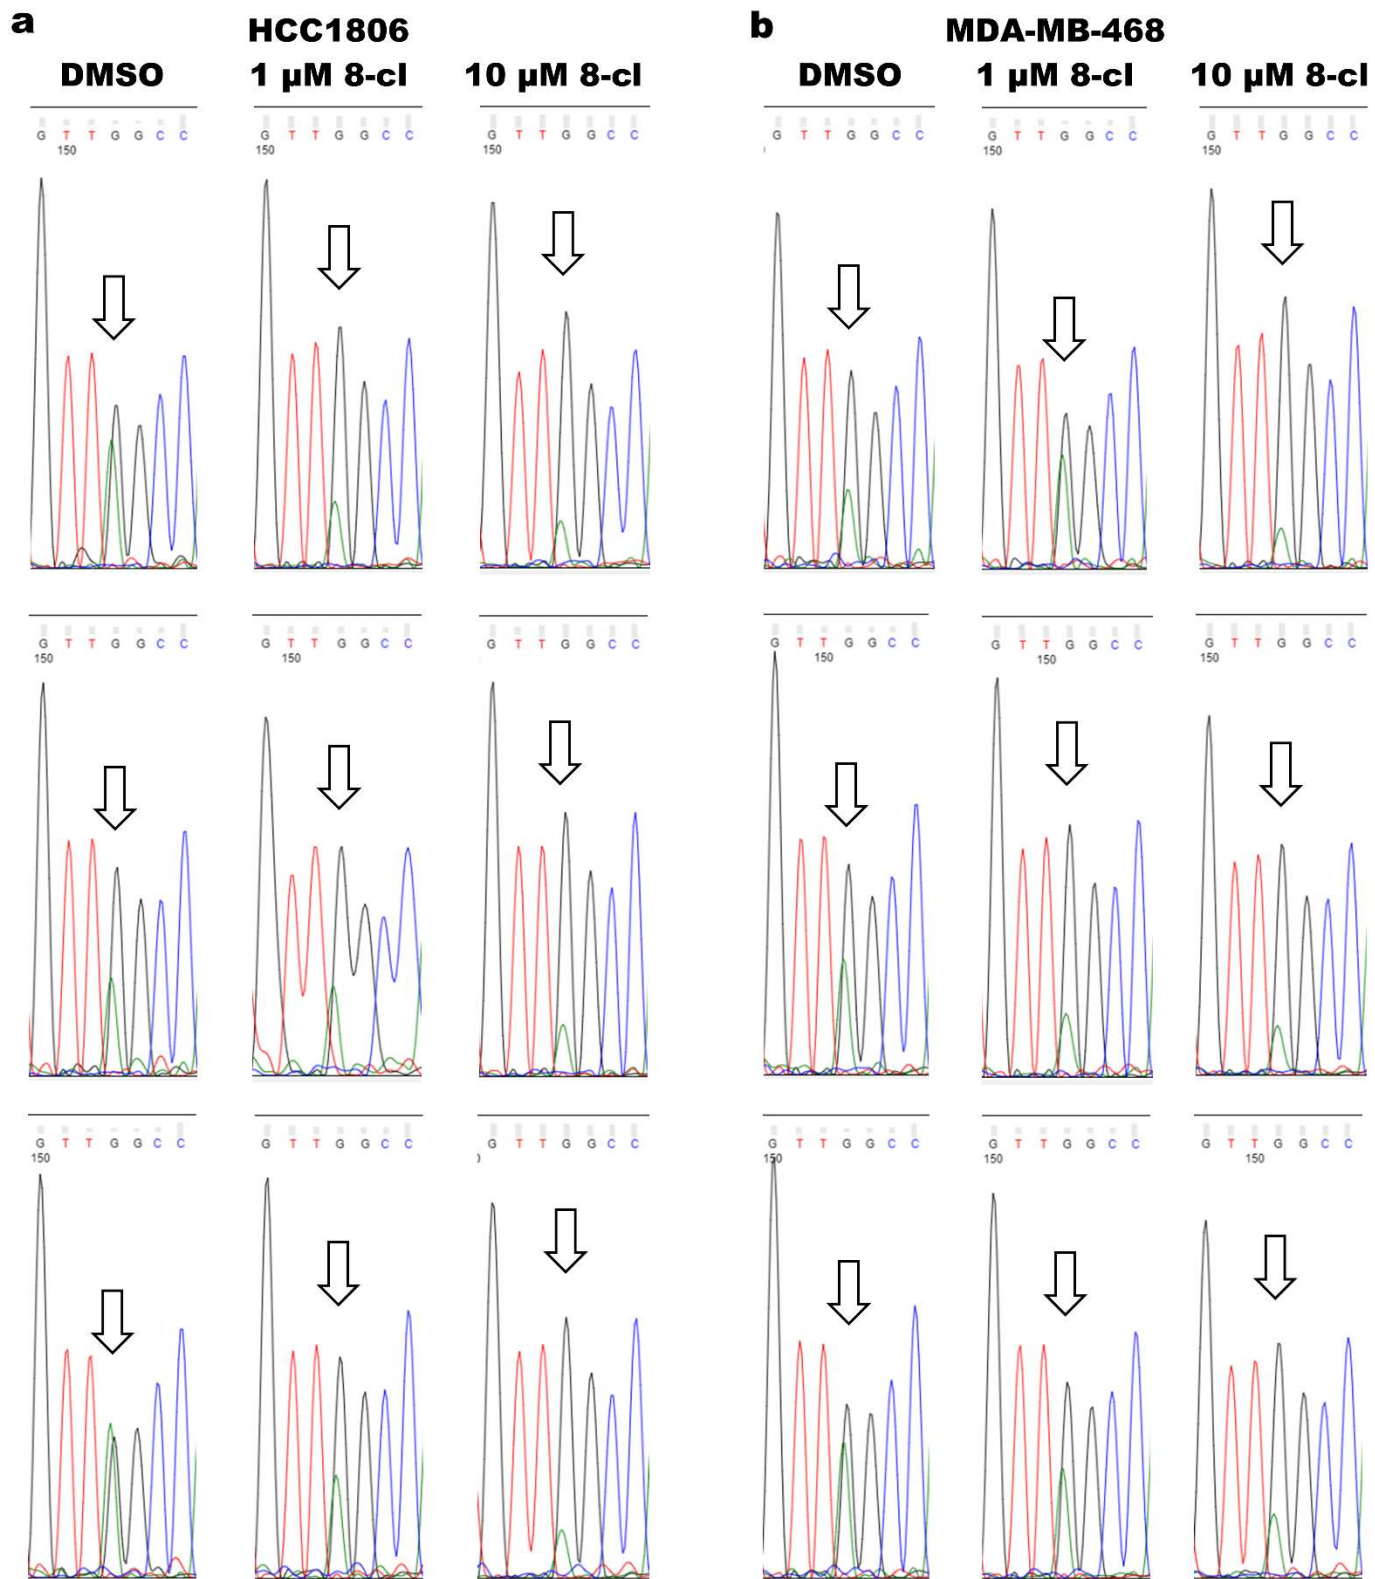

**Supplemental Figure 8:**

Chromatograms for all Sanger sequencing replicates associated with Figure 4e-f.

**a**      **MDA-MB-468**  
**shSCR**      **shADAR**

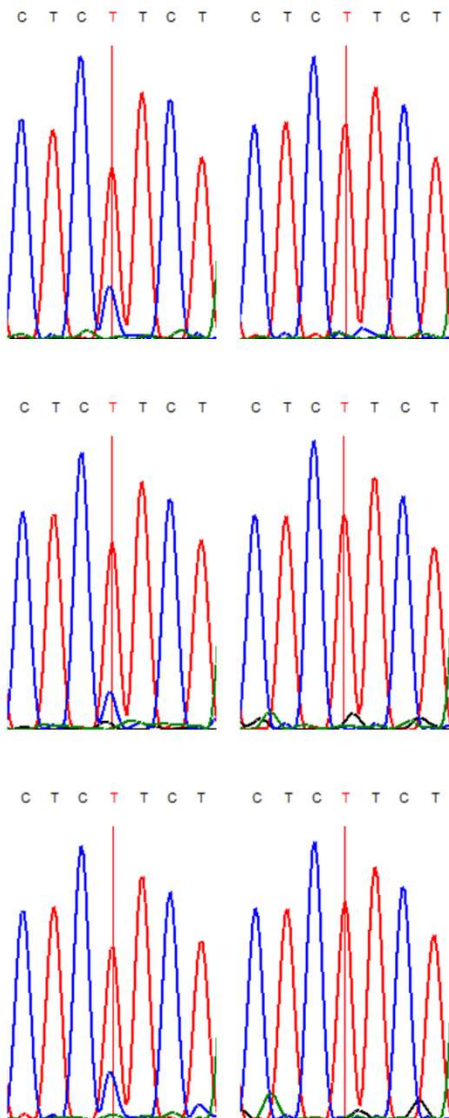

**b**      **HCC1806**  
**shSCR**      **shADAR**

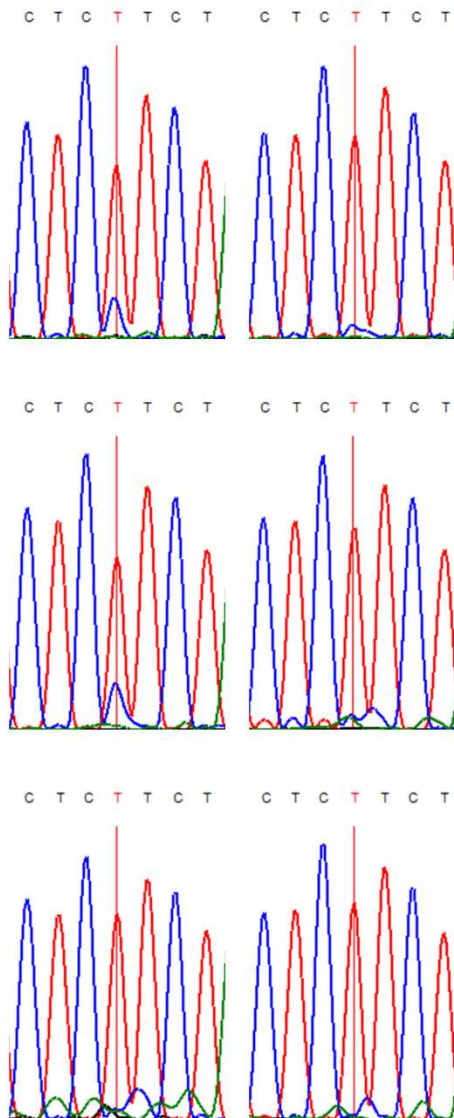

**Supplemental Figure 9:**

Chromatograms for all Sanger sequencing replicates associated with Figure 4g.

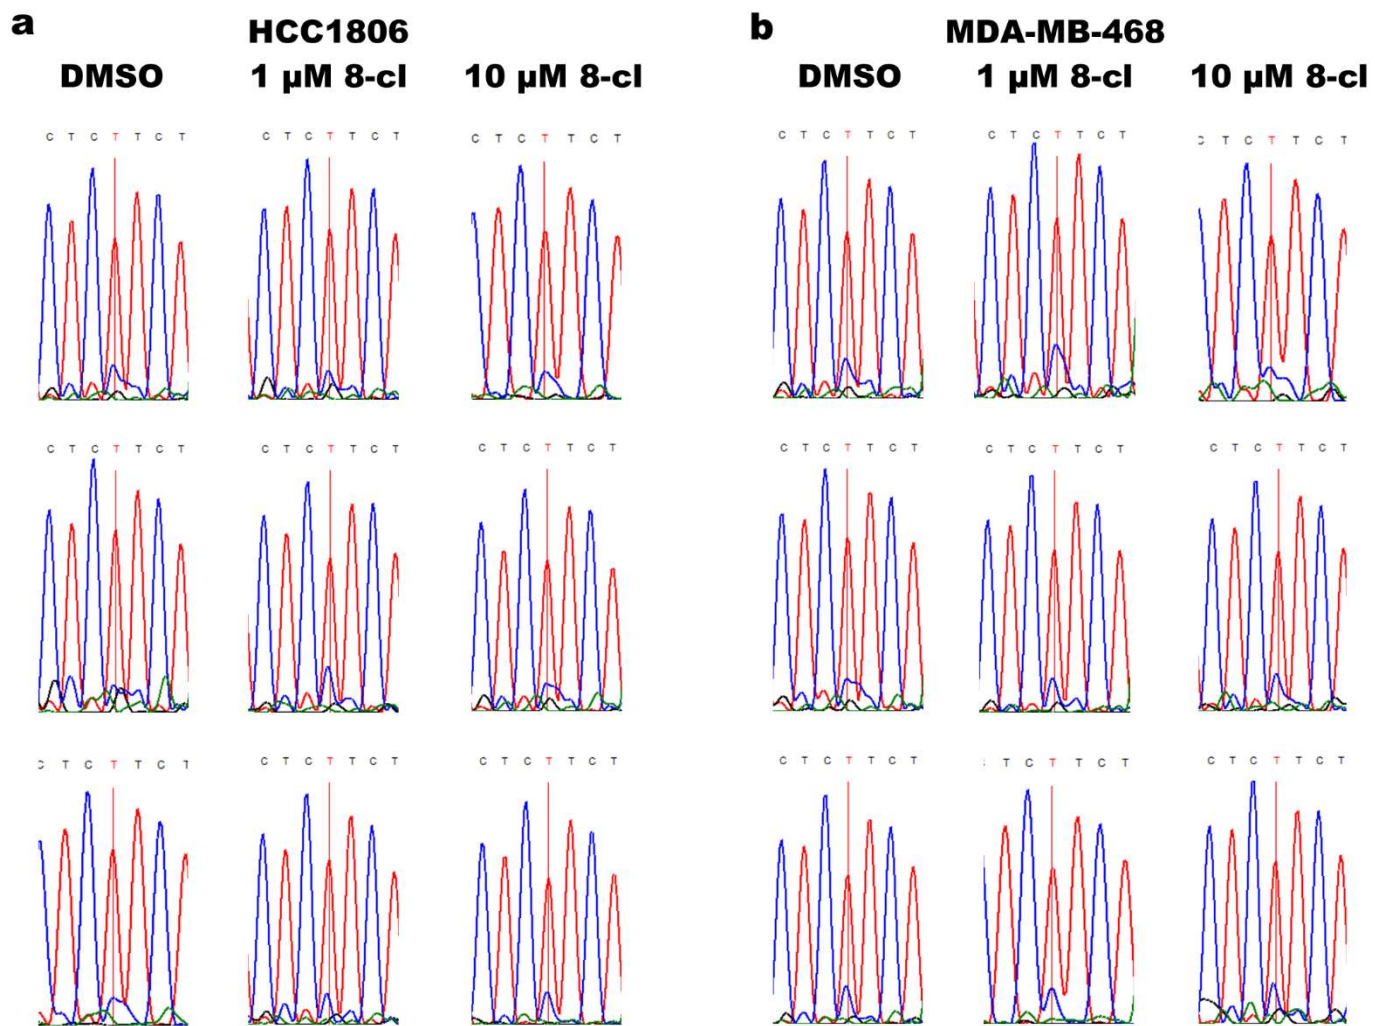

**Supplemental Figure 10:**

Chromatograms for all Sanger sequencing replicates associated with Figure 4h.

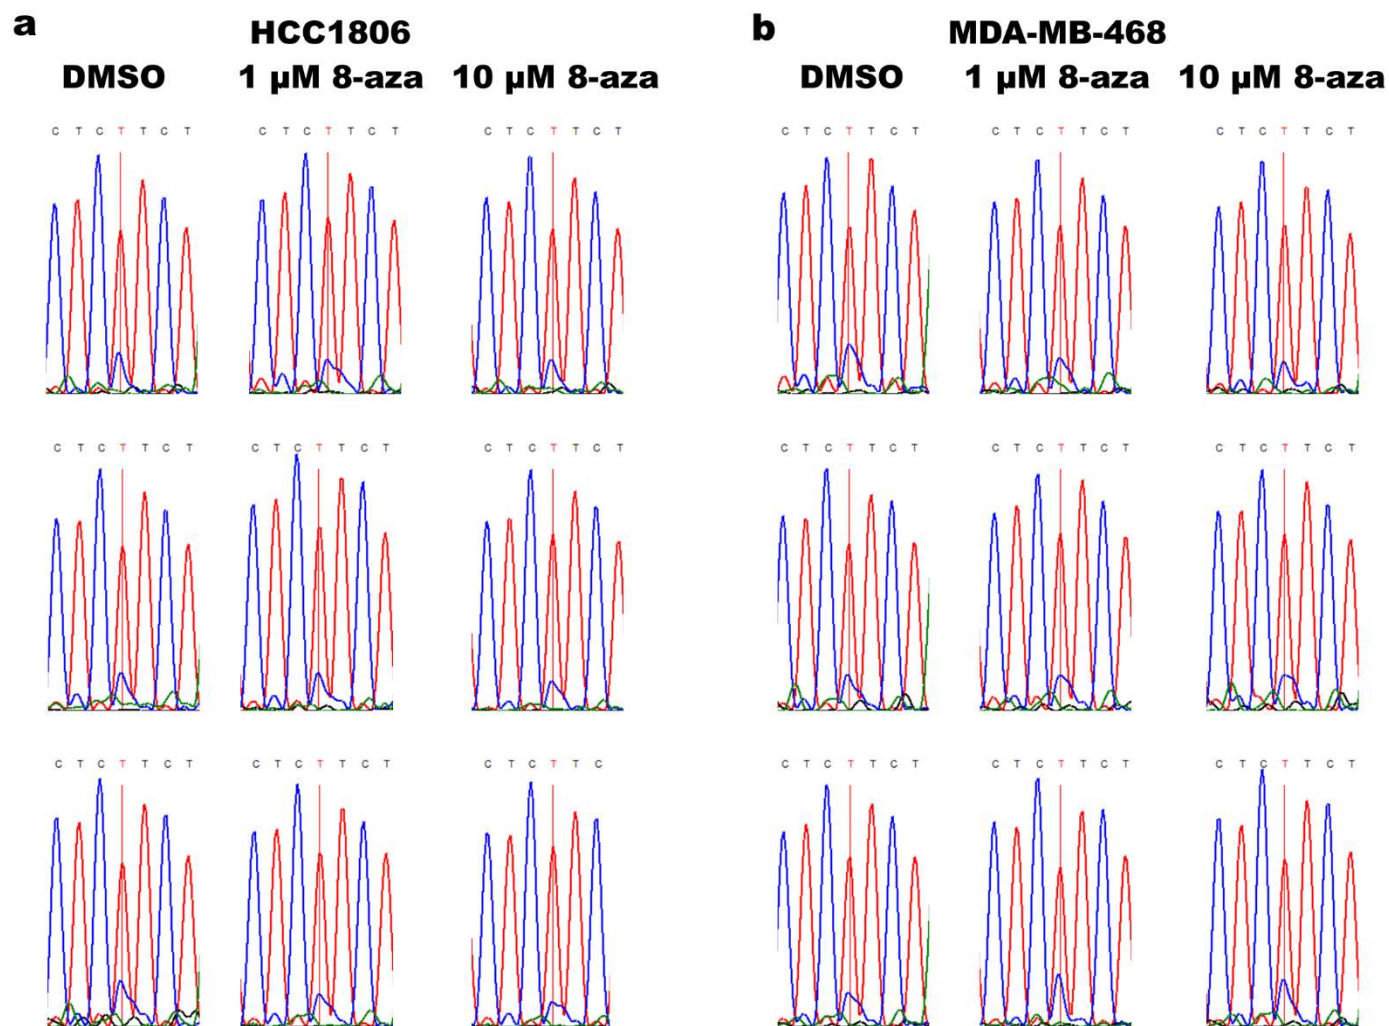

**Supplemental Figure 11:**

Chromatograms for all Sanger sequencing replicates associated with Figure 4i.

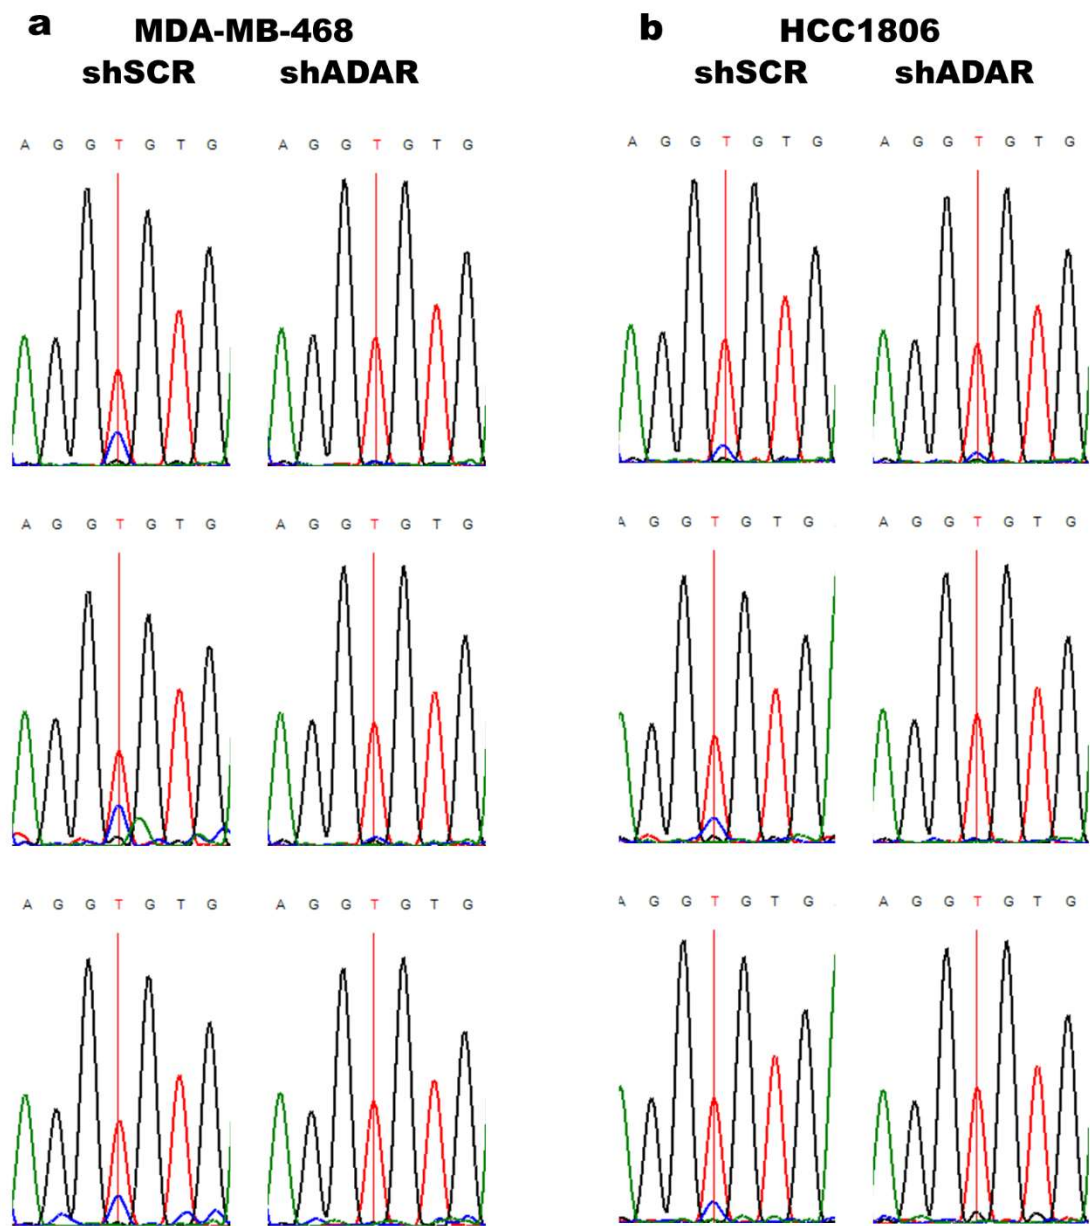

**Supplemental Figure 12:**

Chromatograms for all Sanger sequencing replicates associated with Figure 4j.

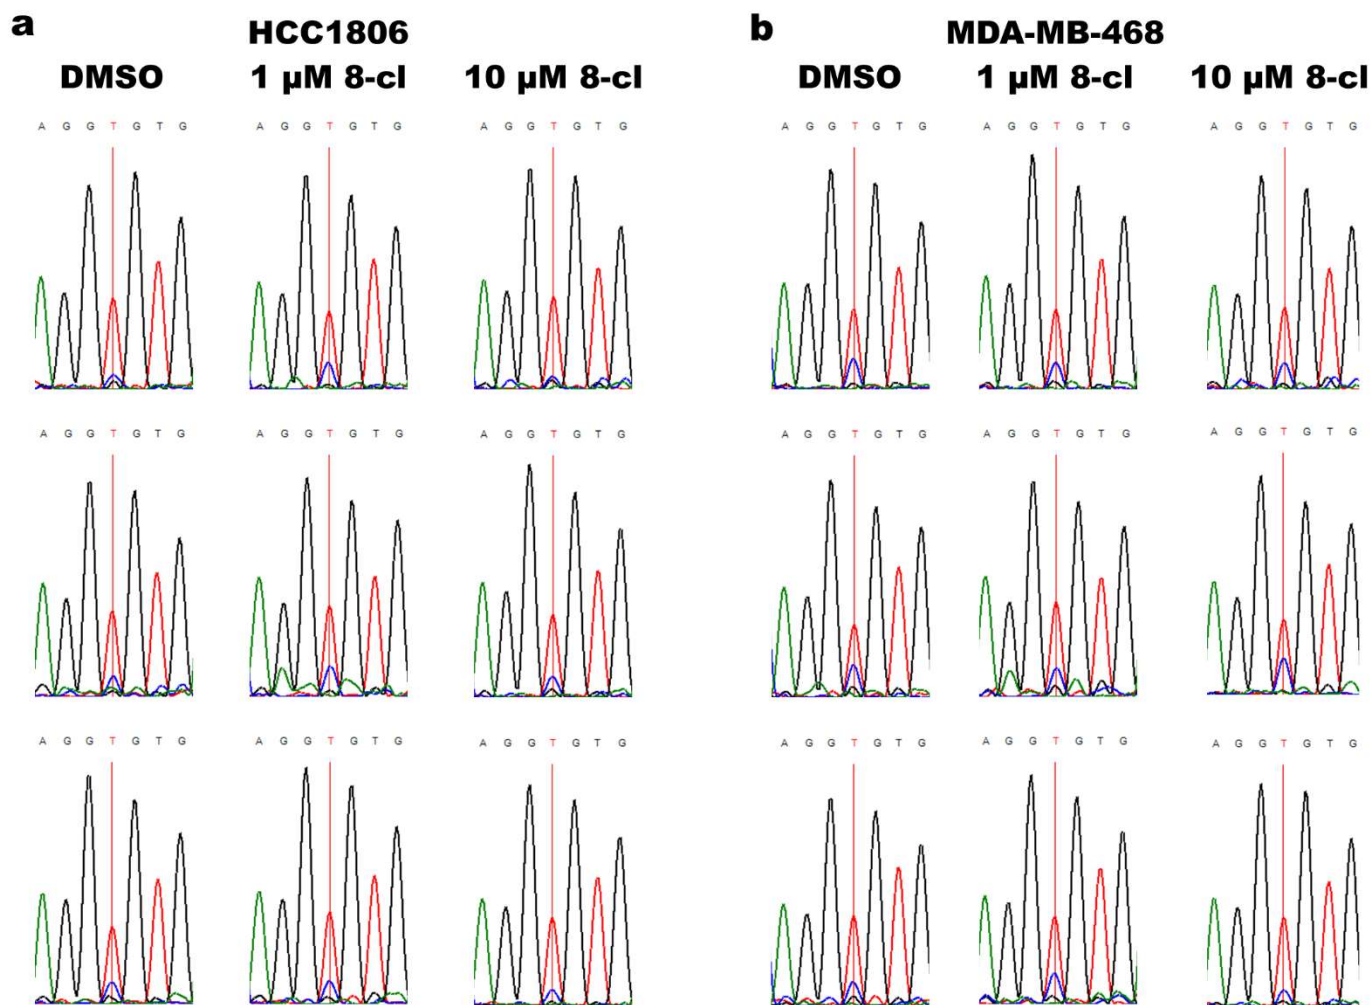

**Supplemental Figure 13:**

Chromatograms for all Sanger sequencing replicates associated with Figure 4k.

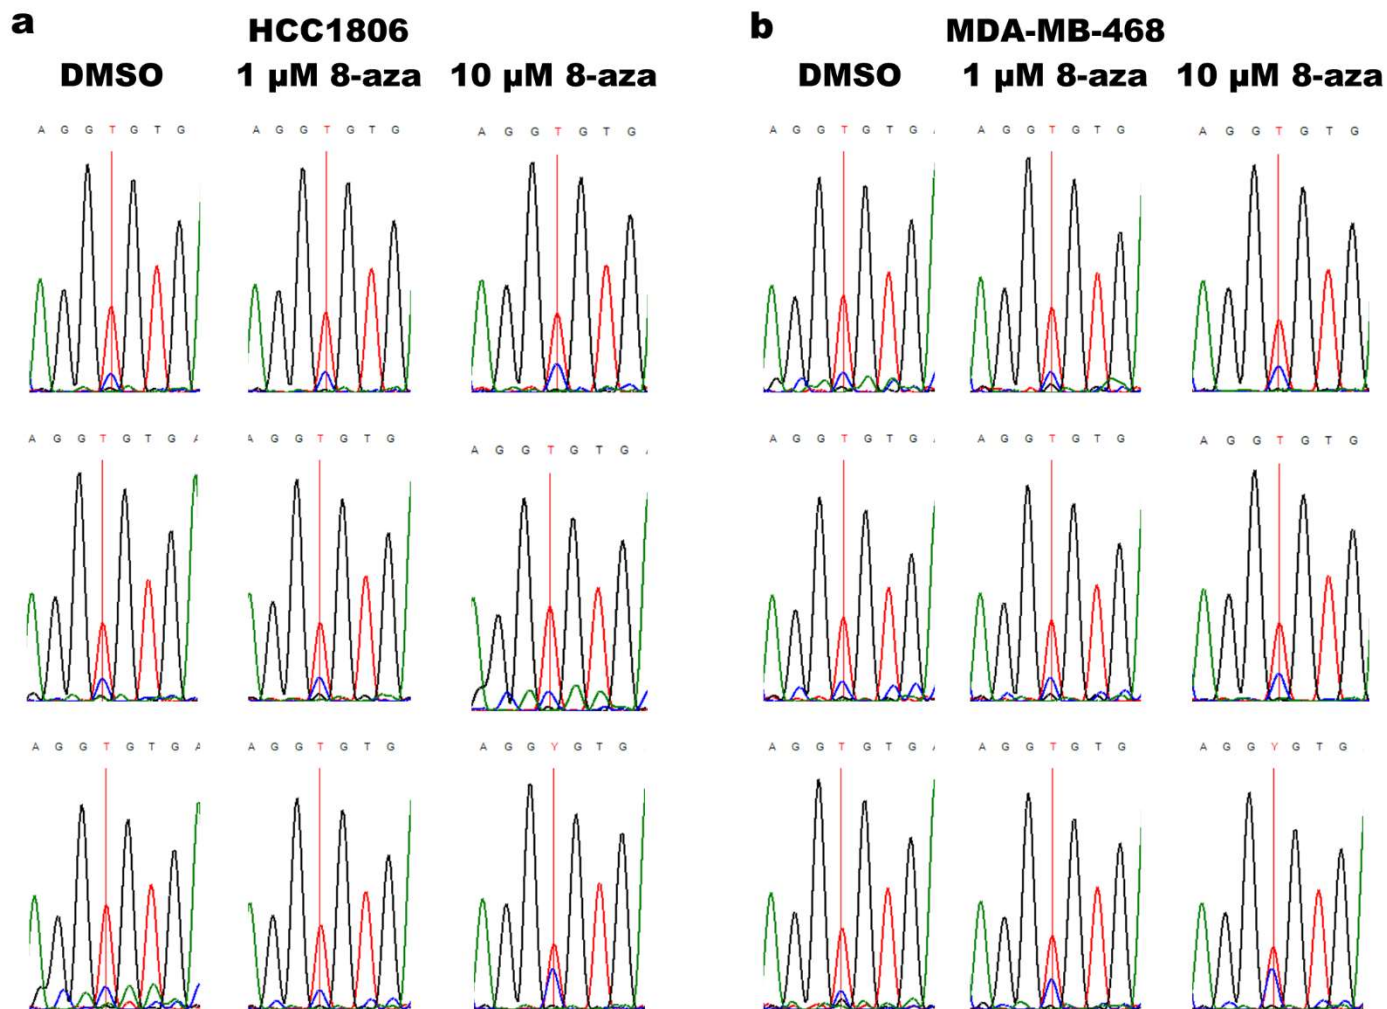

**Supplemental Figure 14:**

Chromatograms for all Sanger sequencing replicates associated with Figure 41.

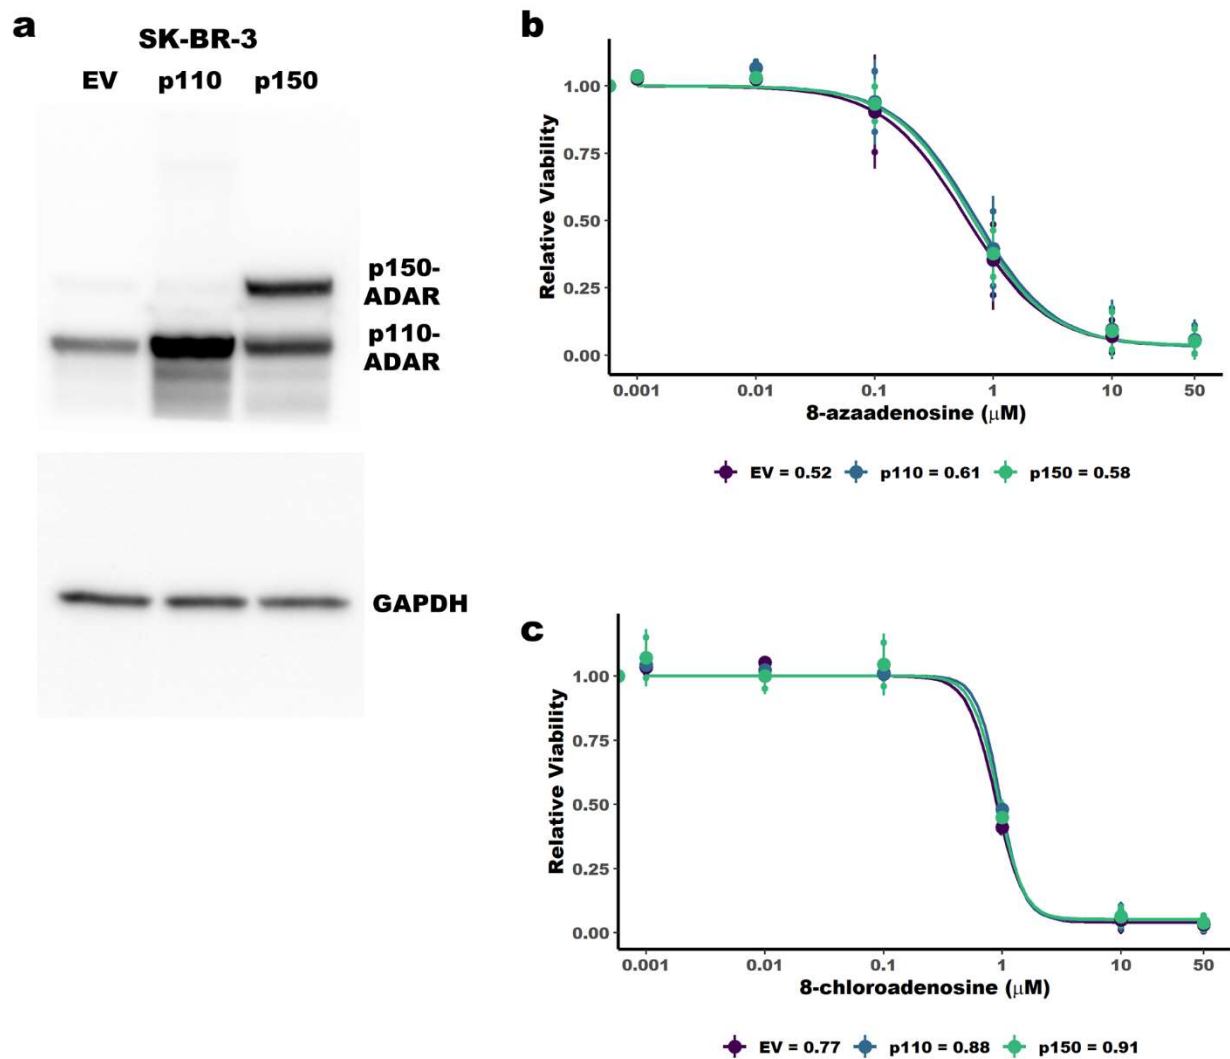

**Supplemental Figure 15:**

**a** Immunoblot showing overexpression of p110 and p150 ADAR in SK-BR-3. **b** and **c** Dose response curves for 8-azaadenosine and 8-chloroadenosine in SK-BR-3 cells with (p110 or p150) or without (EV) overexpression of ADAR. In panels **b**, and **c** the large points are the mean of two independent experiments, the smaller points are the mean of three technical replicates performed for each experiment, error bars are mean  $\pm$  standard deviation.
